# Supplementary material for: Hydrothermal synthesis and formation mechanism of the anatase nanocrystals with co-exposed high-energy {001}, {010} and [111]-facets for enhanced photocatalytic performance
Source: Royal Society of Chemistry journal article supplement (doi:10.1039/c7ra03707d), 2017-01-01
Supplement: c7ra03707d1.pdf [file c7ra03707d1.pdf]

## Supplementary Information

### **Hydrothermal synthesis and formation mechanism of the anatase nanocrystals with co-exposed high-energy {001}, {010} and [111]-facets for enhanced photocatalytic performance**

Xianjun Niu,<sup>a</sup> Yi-en Du,<sup>\*a,b,c</sup> Yufang Liu,<sup>a</sup> Hongxue Qi,<sup>a</sup> Jing An,<sup>a</sup> Xiaojing Yang<sup>\*b</sup> and Qi Feng<sup>c</sup>

<sup>a</sup> School of Chemistry & Chemical Engineering, Jinzhong University, Jinzhong, Shanxi, 030619, P. R. China. E-mail: duyien124@163.com

<sup>b</sup> Beijing Key Laboratory of Energy Conversion and Storage Materials, College of Chemistry, Beijing Normal University, Beijing, 100875, China. Email: yang.xiaojing@bnu.edu.cn

<sup>c</sup> Department of Advanced Materials Science, Faculty of Engineering, Kagawa University, 2217-20 Hayashi-cho, Takamatsu-shi, 761-0396, Japan

**Table S1.** Crystal phase, Morphology, Exposed Facet, Crystal Size, and Surface Area for TiO<sub>2</sub> Nanocrystals.

| sample                 | crystal phase   | morphology                  | exposed facet                  | Crystal size <sup>a</sup> (nm) | S <sub>BET</sub> (m <sup>2</sup> /g) |
|------------------------|-----------------|-----------------------------|--------------------------------|--------------------------------|--------------------------------------|
| P25- TiO <sub>2</sub>  | anatase /rutile | cuboid /near-spherical      | [111]-facet                    | 21.9                           | 49.7                                 |
| T130- TiO <sub>2</sub> | anatase         | cuboid                      | —                              | 27.0                           | 12.8                                 |
| T140- TiO <sub>2</sub> | anatase         | cuboid /truncated bipyramid | —                              | 32.9                           | 15.9                                 |
| T150- TiO <sub>2</sub> | anatase         | cuboid /truncated bipyramid | {001} and {010}                | 34.2                           | 15.3                                 |
| T160- TiO <sub>2</sub> | anatase         | cuboid /truncated bipyramid | {001}, {010}, and [111]-facet  | 37.9                           | 15.0                                 |
| T170- TiO <sub>2</sub> | anatase         | cuboid /truncated bipyramid | {001}, {010}, and [111] -facet | 38.4                           | 10.5                                 |
| T180- TiO <sub>2</sub> | anatase         | cuboid /truncated bipyramid | {001}, {010}, and [111]-facet  | 40.5                           | 6.3                                  |

<sup>a</sup> Average crystal size was calculated by applying the Debye-Scherrer formula<sup>1</sup> to (101) plane at  $2\theta = 25.3^\circ$ , and  $k$  was set as 0.94 without consideration the crystal morphology.

1. Cullity, B. D. *Elements of X-Ray Diffraction*; Addison-Wesley: Reading, MA, 1978.

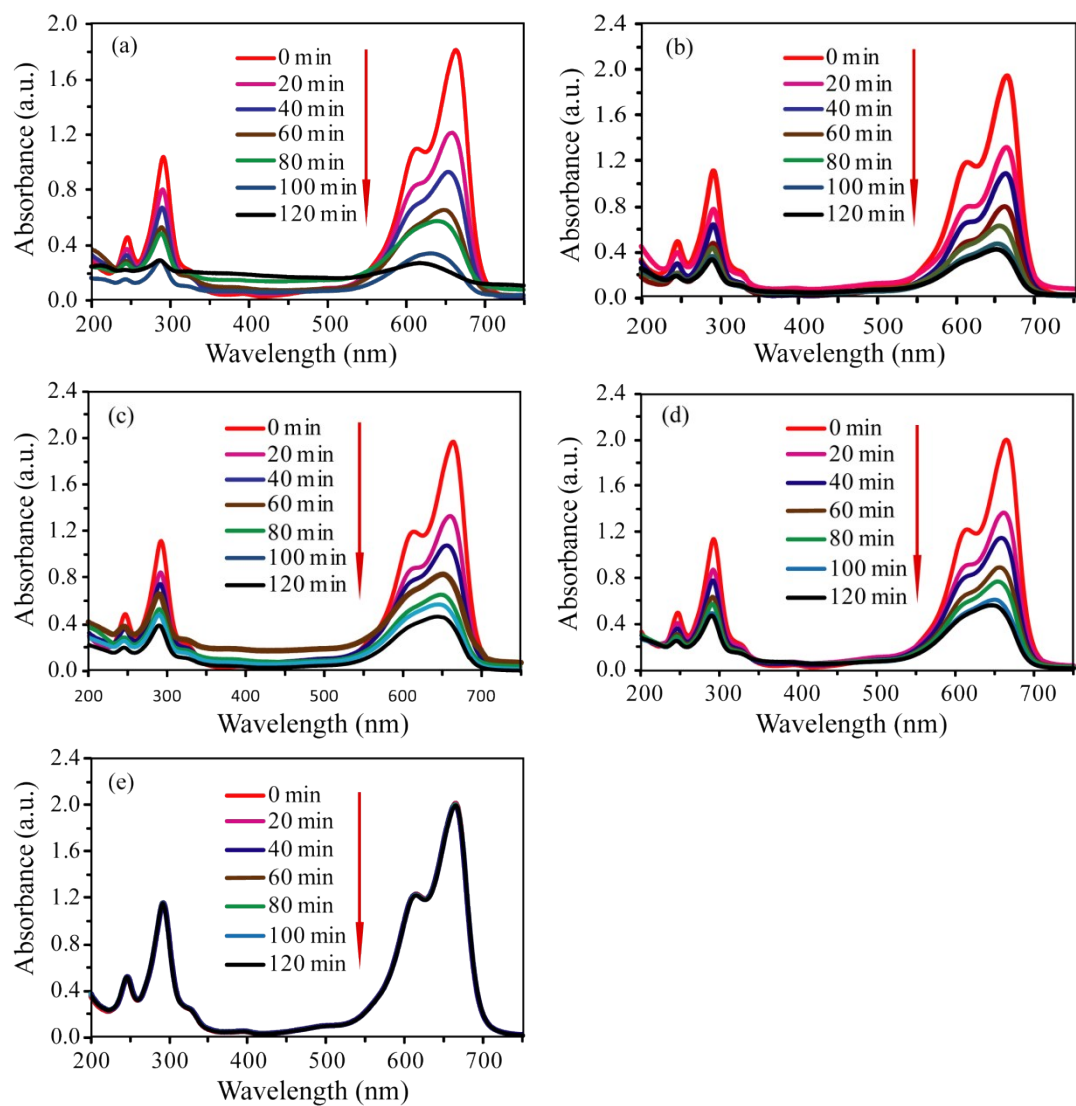

**Fig. S1** UV-visible absorption spectra changes of methylene blue solution as a function of irradiation time in the presence of (a) P25-TiO<sub>2</sub>, (b) T150-TiO<sub>2</sub>, (c) T170-TiO<sub>2</sub>, (d) T180-TiO<sub>2</sub> and (e) absence of TiO<sub>2</sub> nanocrystals catalyst.
